# Supplementary material
Source: HighWire-hosted journal article supplement (doi:10.1101/rna.078977.121)
Supplement: Supplemental_Material.pdf [file Supplemental_Material.pdf]

## Supplemental Material

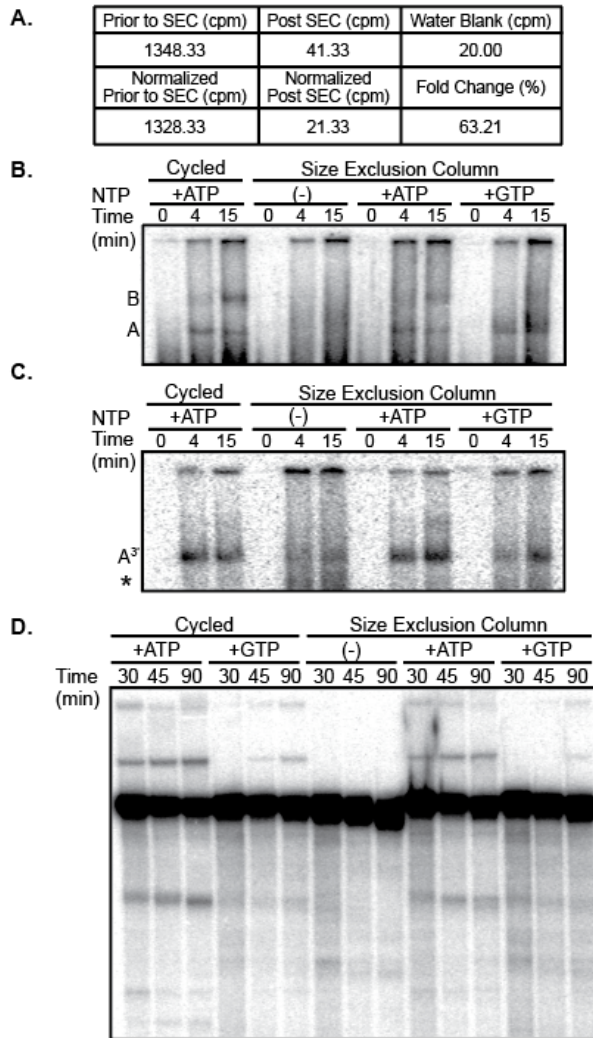

Supplemental Figure 1: Size Exclusion Column Treatment of Nuclear Extract

A. CPM of a sample including radiolabeled UTP prior and post to size exclusion chromatography. B. Representative native gel analysis of *in vitro* spliceosome assembly with a radiolabeled full-length substrate in nuclear extract incubated at 30°C (cycled) or passed through a size exclusion column. A- and B- complex bands positions are labeled. C. Same as (B) except that a A<sup>3</sup>-substrate was used for spliceosome assembly. D. Representative denaturing gel analysis of radiolabeled RNA isolated at the indicated timepoints from *in vitro* splicing reactions using nuclear extract incubated at 30°C (cycled) or passed through a size exclusion column.

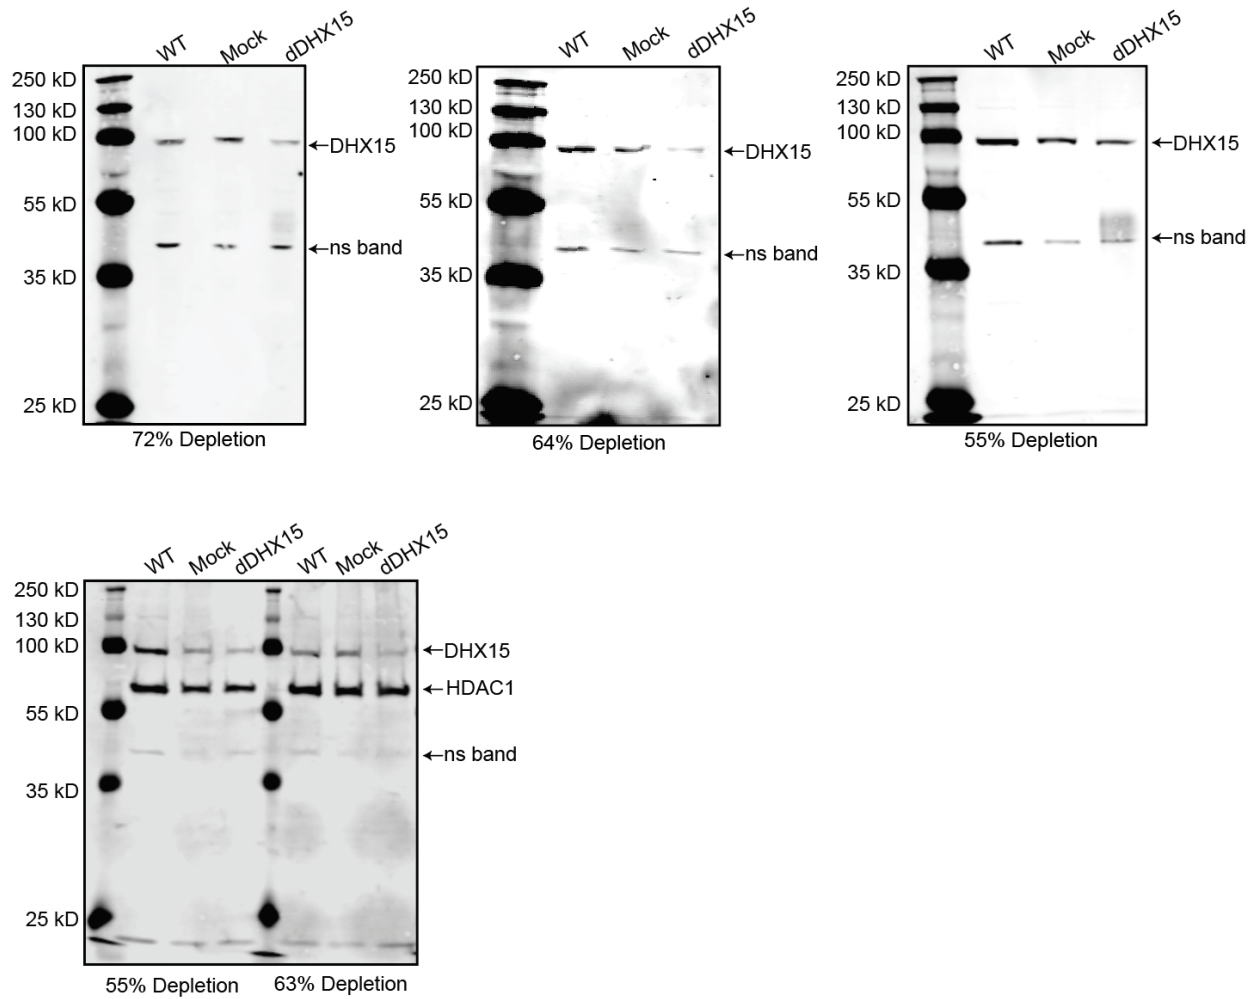

Supplemental Figure 2: Western Blot Analysis of DHX15 Depletion

Full images of western blots with anti-DHX15 to determine depletion efficiency as shown in Figure 2 (top three images). Western blot with both anti-DHX15 and anti-HDAC1 to show that the non-specific (ns) band does not change relative to the house-keeping gene HDAC1.

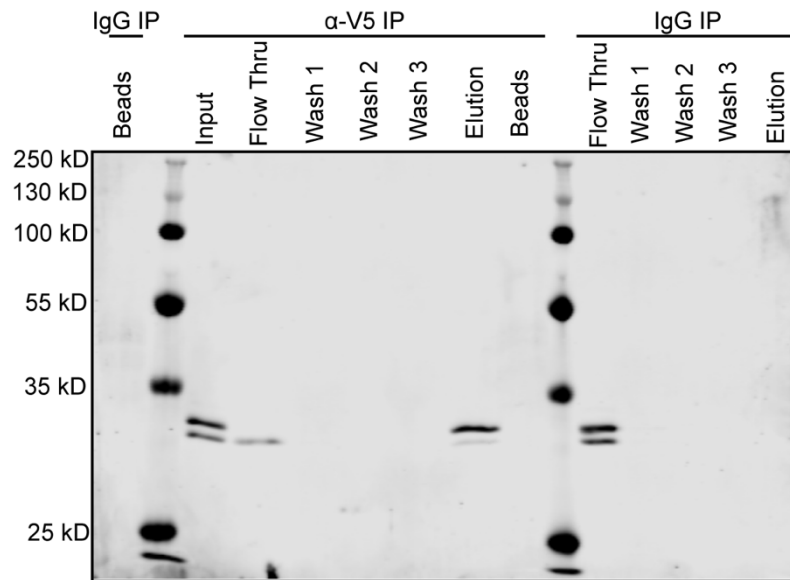

Supplemental Figure 3: Western blot analysis of anti-V5 and IgG IP's  
Full western blot IP's probed with anti-SNRPB2 from Figure 6A.

### Full-Length

GAGACCGGCAGATCAGCTTGGCCGCGTCCATCTGGTCATCTAGGATCTGATATCATCGAT  
GAATTCGAGCTCGGTACCCCGTTTCGTCCTCACTCTCTTCCGCATCGCTGTCTGCGAGGGC  
CAGCGTAAAAGGTGAGTACTCCCTCTCAAAGCGGGCATGACTTCTGCCCTCGAGTTATTA  
ACCCTCACTAAAGGCAGTAGTCAAGGGTTTCCTTGAAGCTTTCGTGCTGACCCTGTCCCTT  
TTTTTTCCACAGCTGCAGGTCGACGTTGAGGACAACTCTTCGCGGTCTTTCCAGTACTCT  
TG

### A<sup>3'</sup>

GTCAAGGGTTTCCTTGAAGCTTTCGTAACCCTTTCCCTTTTTTTTTCCTCTCTCTCTCGA  
GCGTACACCATCAGGGTACGAGCTAGCCCATGGCGTACACCATCAGGGTACGACTAGTAG  
ATCTCGTACACCATCAGGGTACGGAATTCT

### A<sup>min</sup>

GTAACCCTTTCCCTTTTTTTTTCCTCTCTCTCTGCTCGAGCGTACACCATCAGGGTACGA  
GCTAGCCCATGGCGTACACCATCAGGGTACGACTAGTAGATCTCGTACACCATCAGGGTA  
CGGAATTCT

Supplemental Figure 4: RNA substrates

DNA template sequences of the RNA substrates utilized in this study.

| Name              | DNA Sequence         |
|-------------------|----------------------|
| U2 snRNA nt 32-46 | AGAACAGATACTACA      |
| U2 snRNA nt 24-38 | TACTACACTTGATCT      |
| U2 snRNA nt 12-26 | TCTTAGCCAAAAGGC      |
| U2 snRNA nt 1-15  | AGGCCGAGAAGCGAT      |
| Control Oligo     | CTGATGTCCGCAGACAATGT |

Supplemental Figure 5: Sequences of DNA oligonucleotides complementary to the indicated U2 snRNA region for RNase H digestion.
